# Supplementary material for: Comparison of Structural and Functional Properties of Wheat Starch Under Different Soil Drought Conditions
Source: PubMed Central journal article supplement (PMC5615046; doi:10.1038/s41598-017-10802-3), 2017-09-26
Supplement: 41598_2017_10802_MOESM1_ESM.pdf [file 41598_2017_10802_MOESM1_ESM.pdf]

1 **Supporting Information**

2  
3 **Comparison of Structural and Functional Properties of Wheat Starch Under Different**  
4 **Soil Drought Conditions**

5 Weiyang Zhang <sup>a</sup>, Junfei Gu <sup>a</sup>, Zhiqin Wang <sup>a</sup>, Cunxu Wei <sup>a</sup>, Jianchang Yang <sup>a\*</sup>, Jianhua  
6 Zhang <sup>b</sup>

7 <sup>a</sup> Jiangsu Key Laboratory of Crop Genetics and Physiology/Co-Innovation Center for Modern  
8 Production Technology of Grain Crops, Yangzhou University, Yangzhou, Jiangsu, China

9 <sup>b</sup> School of Life Sciences and State Key Laboratory of Agrobiotechnology, The Chinese  
10 University of Hong Kong, Hong Kong, China

11  
12 \* Corresponding Author

13 Jianchang Yang. Address: College of Agriculture, Yangzhou University, Yangzhou 225009,  
14 China. Telephone/Fax: +86 514 8797 9317. E-mail: [jcyang@yzu.edu.cn](mailto:jcyang@yzu.edu.cn); [jszyjc@126.com](mailto:jszyjc@126.com)

15  
16  
17  
18  
19  
20  
21  
22  
23  
24  
25

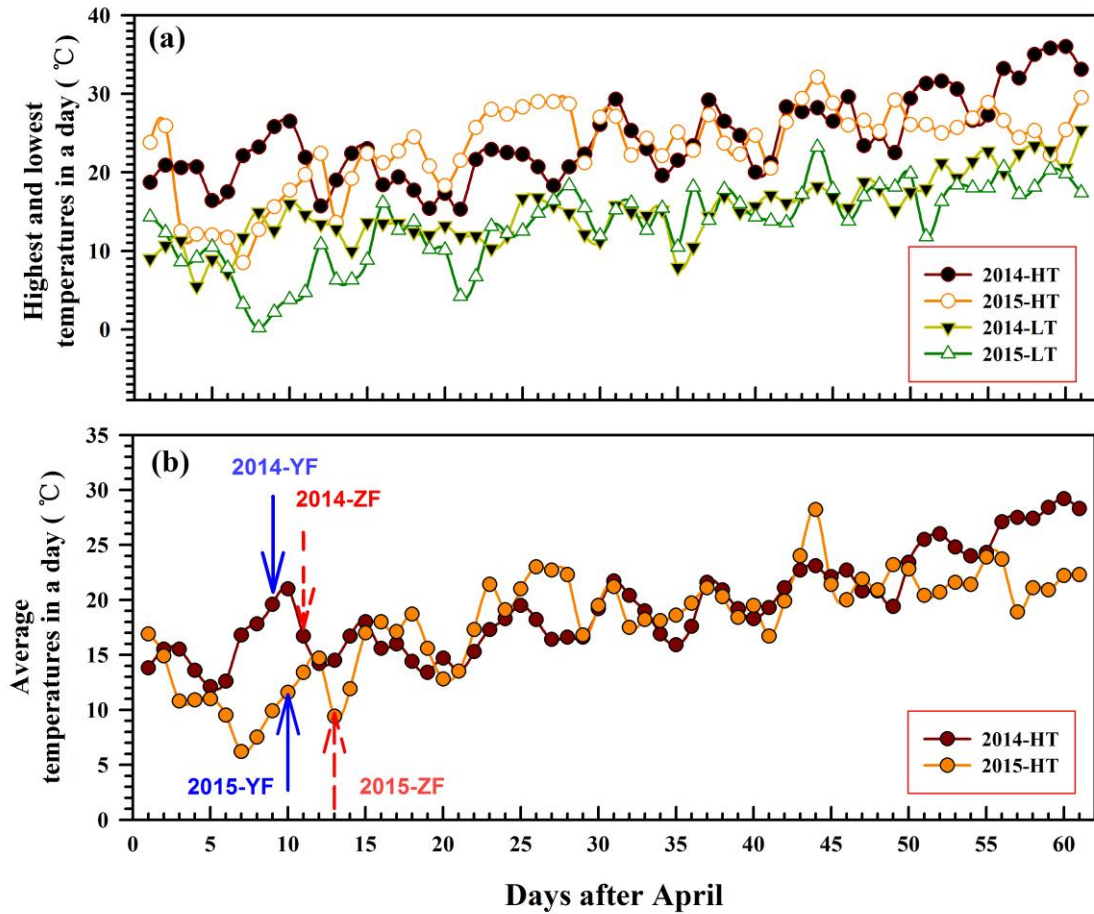

26

27

**Supplementary Fig. S1. Temperatures during the grain-filling stage (April-May) in 2014**

28

**and 2015. HT, LT and AT indicate the highest temperatures, lowest temperatures and**

29

**average temperatures in a day, respectively. Arrows indicate the flowering date of the two**

30

**cultivars in two years. YF and ZF indicate the Yangmai 16 flowered and Zhenmai 9 flowered,**

31

**respectively.**

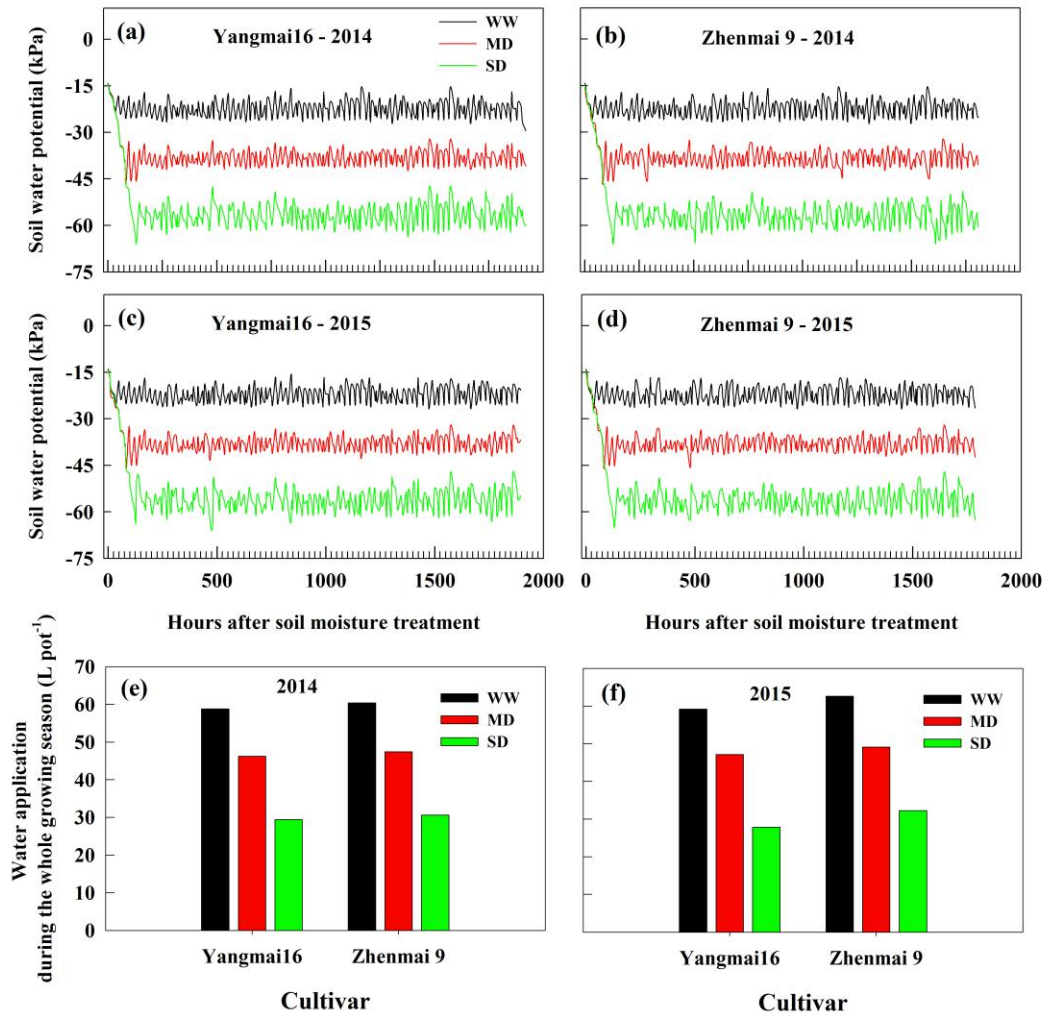

32

33

34

35

36

37

38

**Supplementary Fig. S2. Soil water potential (a-d) after soil moisture treatments and water application during whole growing (e, f) of the wheat cultivars Yangmai 16 and Zhenmai 9 under various soil moisture treatments in 2014 and 2015. WW, MD, and SD represent well-watered, moderate soil-drought, and severe soil-drought treatments, respectively. Vertical bars represent  $\pm$  standard deviations of the mean ( $n = 3$ ), where they exceed the size of the symbol.**

39 **Supplementary Table S1.** Correlation analysis between fine structure and crystallinity, swelling power, thermal properties, and hydrolysis  
 40 properties of starches.<sup>a</sup>

| Correlated with                                        | crystallinity | Swelling power | Thermal properties <sup>d</sup> |                         |          | Hydrolysis properties <sup>e</sup> |          |          |
|--------------------------------------------------------|---------------|----------------|---------------------------------|-------------------------|----------|------------------------------------|----------|----------|
|                                                        |               |                | $\Delta H_{\text{gel}}$         | $\Delta H_{\text{ret}}$ | R (%)    | HCL                                | PPA      | AAG      |
| Amylose content <sup>b</sup>                           | -0.968**      | -0.898**       | -0.971**                        | 0.901**                 | 0.943**  | -0.973**                           | -0.985** | -0.992** |
| Branching degree of amylopectin <sup>b</sup>           | 0.916**       | 0.850**        | 0.918**                         | -0.920**                | -0.939** | 0.949**                            | 0.932**  | 0.937**  |
| Proportion of DP $\leq$ 24 in amylopectin <sup>c</sup> | 0.939**       | 0.919**        | 0.962**                         | -0.925**                | -0.956** | 0.931**                            | 0.979**  | 0.984**  |
| Proportion of DP $\geq$ 37 in amylopectin <sup>c</sup> | -0.896**      | -0.899**       | -0.961**                        | 0.923**                 | 0.959**  | -0.921**                           | -0.959** | -0.970** |
| Average chain length of amylopectin <sup>c</sup>       | -0.969**      | -0.898**       | -0.961**                        | 0.893**                 | 0.932**  | -0.976**                           | -0.979** | -0.990** |
| Proportion of large granules (d > 10 $\mu\text{m}$ )   | -0.576*       | -0.227         | -0.411                          | 0.245                   | 0.338    | -0.555                             | -0.475   | -0.458   |
| Proportion of small granules (d < 10 $\mu\text{m}$ )   | 0.576*        | 0.227          | 0.411                           | -0.245                  | -0.338   | 0.555                              | 0.475    | 0.458    |

41 <sup>a</sup> \* and\*\* indicate the significance at  $p < 0.05$  and  $p < 0.01$  level (n=12), respectively.

42 <sup>b</sup> Molecular weight distribution of isoamylase-debranched starch is determined by gel-permeation chromatography.

43 <sup>c</sup> Chain length distribution of amylopectin is determined by high-performance anion-exchange chromatography.

44 <sup>d</sup>  $H_{\text{gel}}$ , gelatinization enthalpy;  $\Delta H_{\text{ret}}$ , retrogradation enthalpy; %R, retrogradation percentage.

45 <sup>e</sup> Starch is hydrolyzed using hydrochloric acid (HCl), porcine pancreatic  $\alpha$ -amylase (PPA) or *Aspergillus niger* amyloglucosidase (AAG).

46

**Supplementary Table S2.** Correlation analysis between molecular structure and *in vitro* digestion of starches.<sup>a</sup>

| Correlated with                                        | Native starch |          |          | Gelatinized starch |          |          | Retrograded starch |          |          |
|--------------------------------------------------------|---------------|----------|----------|--------------------|----------|----------|--------------------|----------|----------|
|                                                        | RDS (%)       | SDS (%)  | RS (%)   | RDS (%)            | SDS (%)  | RS (%)   | RDS (%)            | SDS (%)  | RS (%)   |
| Apparent amylose content                               | -0.886**      | -0.920** | 0.942**  | -0.946**           | 0.819**  | 0.952**  | -0.872**           | 0.776**  | 0.868**  |
| Amylopectin short branch-chain content <sup>b</sup>    | 0.904**       | 0.941**  | -0.963** | 0.954**            | -0.836** | -0.958** | 0.900**            | -0.793** | -0.898** |
| Amylopectin long branch-chain content <sup>b</sup>     | -0.780**      | -0.805** | 0.828**  | -0.750**           | 0.685*   | 0.752**  | -0.727**           | 0.584*   | 0.752**  |
| Amylose content <sup>b</sup>                           | -0.902**      | -0.941** | 0.962**  | -0.969**           | 0.846**  | 0.974**  | -0.910**           | 0.815**  | 0.902**  |
| Branching degree of amylopectin <sup>b</sup>           | 0.879**       | 0.910**  | -0.933** | 0.890**            | -0.795** | -0.893** | 0.850**            | -0.735** | -0.856** |
| Proportion of DP 6-12 in amylopectin <sup>c</sup>      | 0.869**       | 0.897**  | -0.920** | 0.951**            | -0.785** | -0.962** | 0.882**            | -0.704** | -0.951** |
| Proportion of DP 13-24 in amylopectin <sup>c</sup>     | 0.813**       | 0.836**  | -0.860** | 0.891**            | -0.738** | -0.903** | 0.807**            | -0.713** | -0.807** |
| Proportion of DP 25-36 in amylopectin <sup>c</sup>     | -0.761**      | -0.877** | 0.862**  | -0.887**           | 0.814**  | 0.885**  | -0.839**           | 0.825**  | 0.796**  |
| Proportion of DP $\geq$ 37 in amylopectin <sup>c</sup> | -0.855**      | -0.836** | 0.878**  | -0.905**           | 0.715**  | 0.923**  | -0.816**           | 0.651*   | 0.850**  |
| Average chain length of amylopectin <sup>c</sup>       | -0.906**      | -0.926** | 0.955**  | -0.968**           | 0.823**  | 0.977**  | -0.904**           | 0.808**  | 0.898**  |
| Relative crystallinity                                 | 0.848**       | 0.910**  | -0.920** | 0.925**            | -0.814** | -0.929** | 0.873**            | -0.850** | -0.832** |
| Proportion of large granules (d > 10 $\mu$ m)          | -0.622*       | -0.692*  | 0.689*   | -0.552             | 0.696*   | 0.519    | -0.260             | 0.773**  | 0.634*   |
| Proportion of small granules (d < 10 $\mu$ m)          | 0.622*        | 0.692*   | -0.689*  | 0.552              | -0.696*  | -0.519   | 0.260              | -0.773** | -0.634*  |

48 <sup>a</sup> \* and\*\* indicate the significance at  $p < 0.05$  and  $p < 0.01$  level (n=12), respectively.

49 <sup>b</sup> Molecular weight distribution of isoamylase-debranched starch is determined by gel-permeation chromatography.

50 <sup>c</sup> Chain length distribution of amylopectin is determined by high-performance anion-exchange chromatography.
